# Supplementary material
Source: publisher figshare collection journal article supplement (https://frontiersin.figshare.com/ndownloader/files/24140708)
Supplement: Supplementary file [file 24140708]

# Resilience among older adults: The value of different resilience approaches

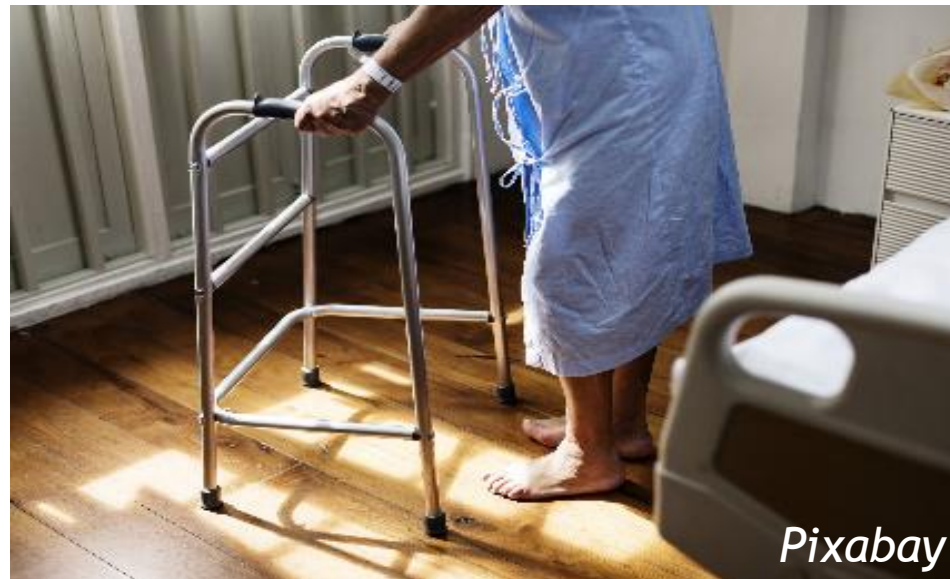

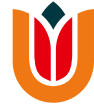

# Contents

- Introduction resilience
- Dynamical systems approach
  - Examples
- A-priori approach
  - Examples
- Summary



# Resilience: doing well despite adversity

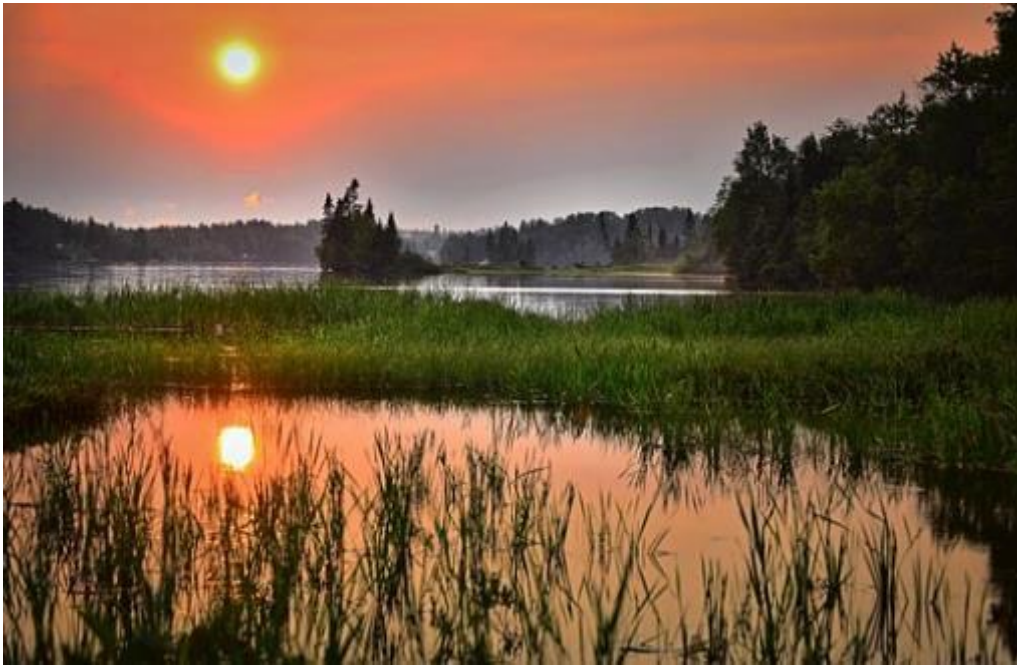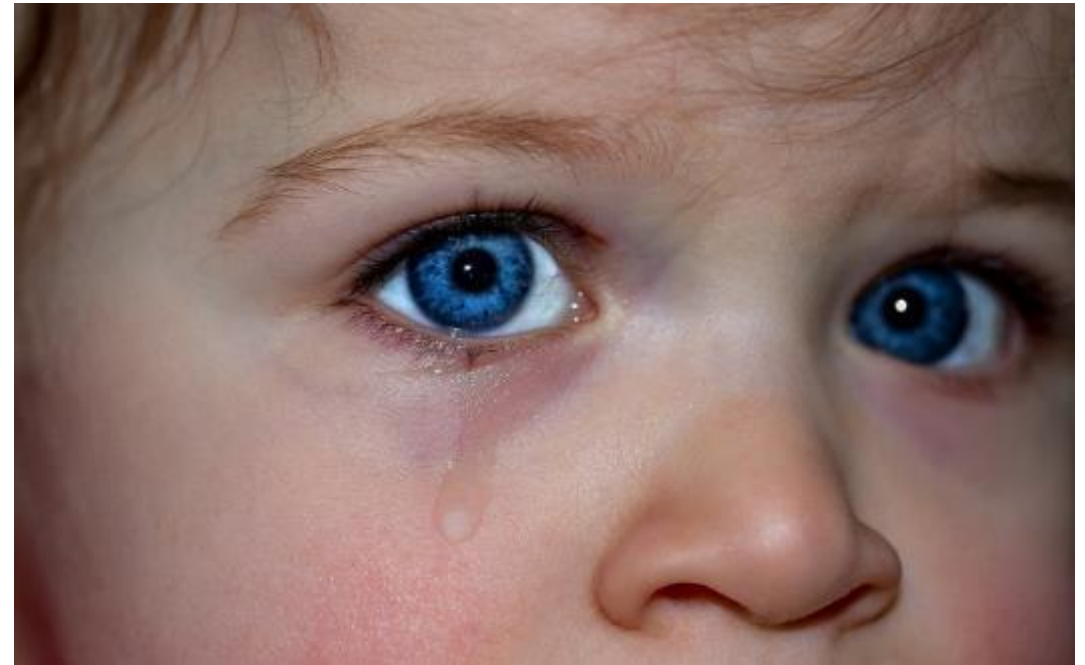

*Pixabay*



# Dynamical systems approach

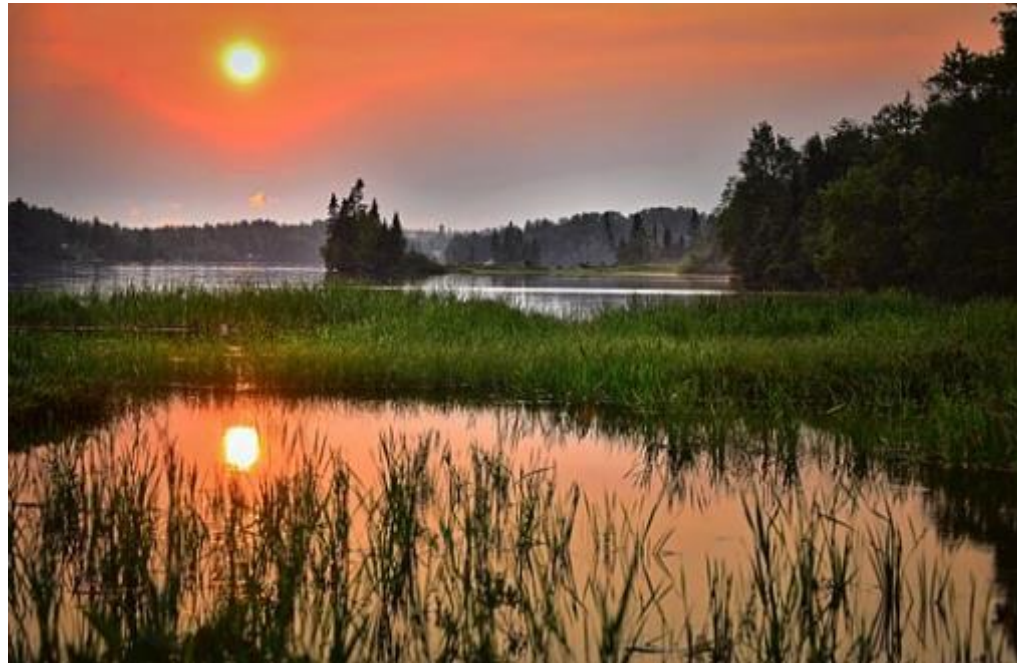

*Pixabay*



# Dynamical systems approach

*“An individual’s ability to resist functional decline or recover physical health following a stressor.”*

*Gijzel et al. 2018*  
*Whitson et al. 2016*

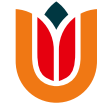

# Dynamical systems approach: complex systems

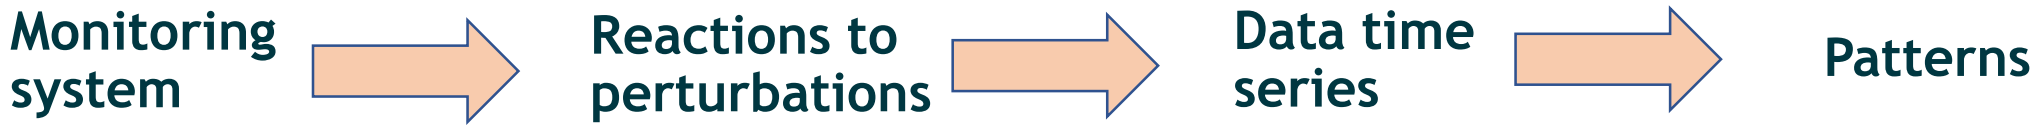

Universal Patterns

Resilience

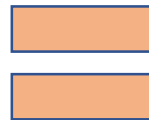

Validation

Dynamical Indicators of Resilience (DIORs)

*Gijzel et al. 2018*

# Examples



*Gijzel et al. 2017*

Physical

Mental

Social

100x: Health?

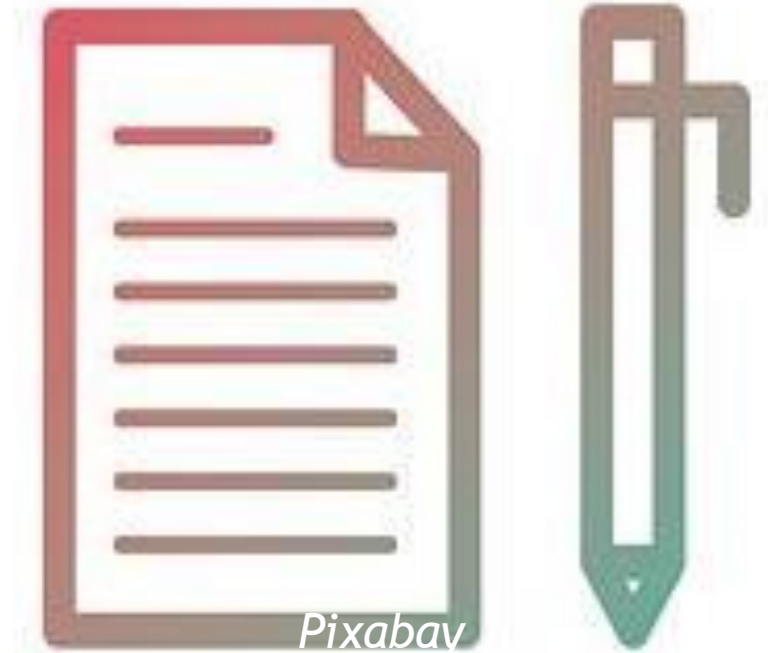

# Dynamical Indicators of Resilience (DIORs)

## *Universal patterns*

Low variance

Low temporal autocorrelation

Low cross correlation

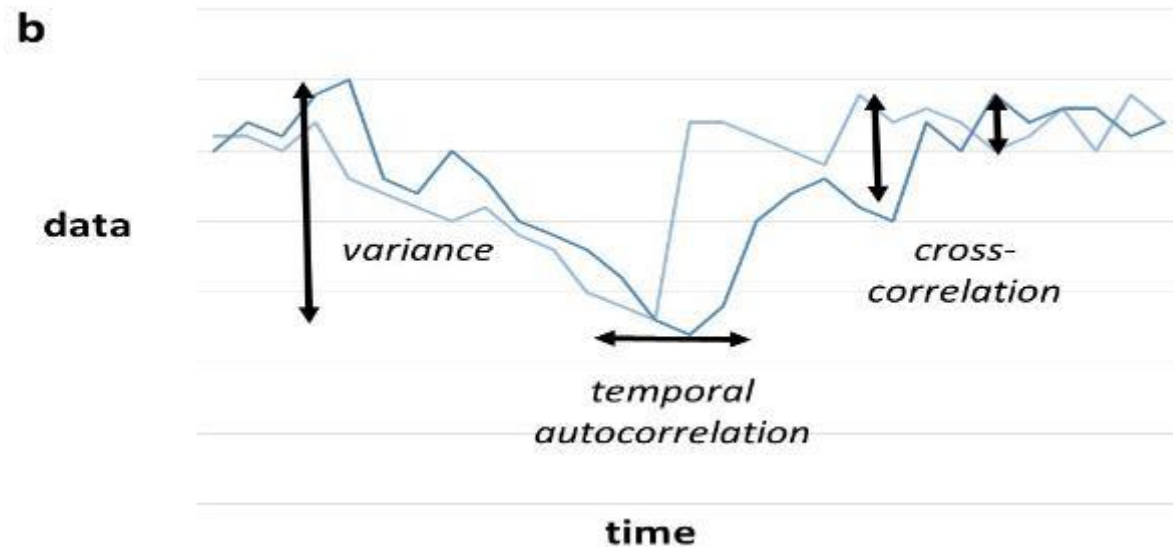

*See original graph in Gijzel et al. 2017*



# Example

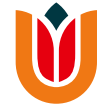

*Gijzel et al. 2018*

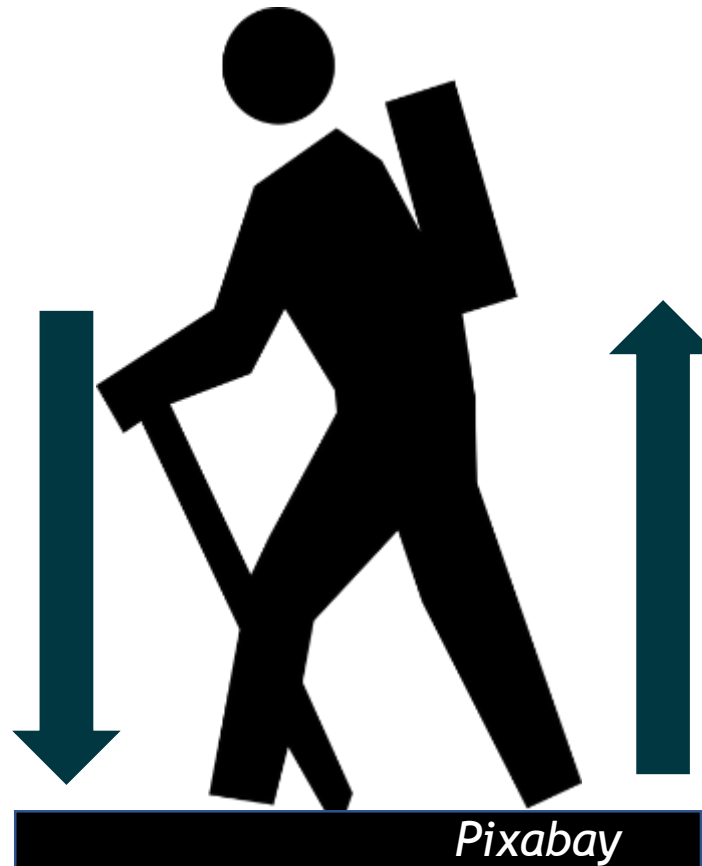

Future applications:  
-wearables  
-ecological  
momentary  
assessment



# A-priori approach

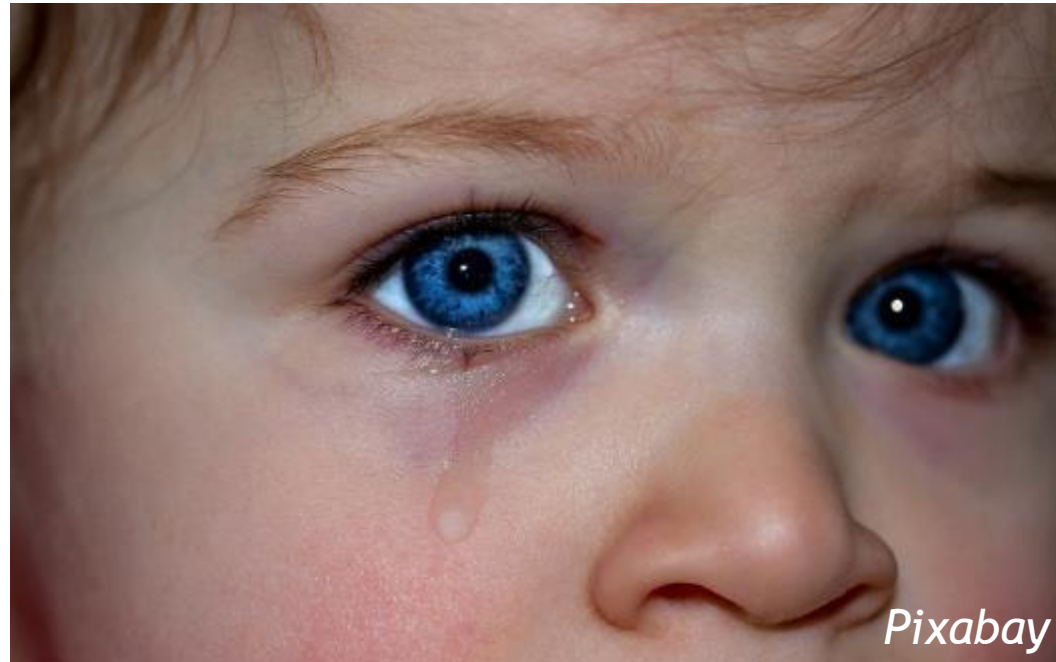



# A-priori approach

*“Resilience is defined as the process of effectively negotiating, adapting to, or managing significant sources of stress or trauma. Assets and resources within the individual, their life and environment facilitate this capacity for adaptation and ‘bouncing back’ in the face of adversity. Across the life course, the experience of resilience will vary”*

*Windle 2011*



# A-priori approach

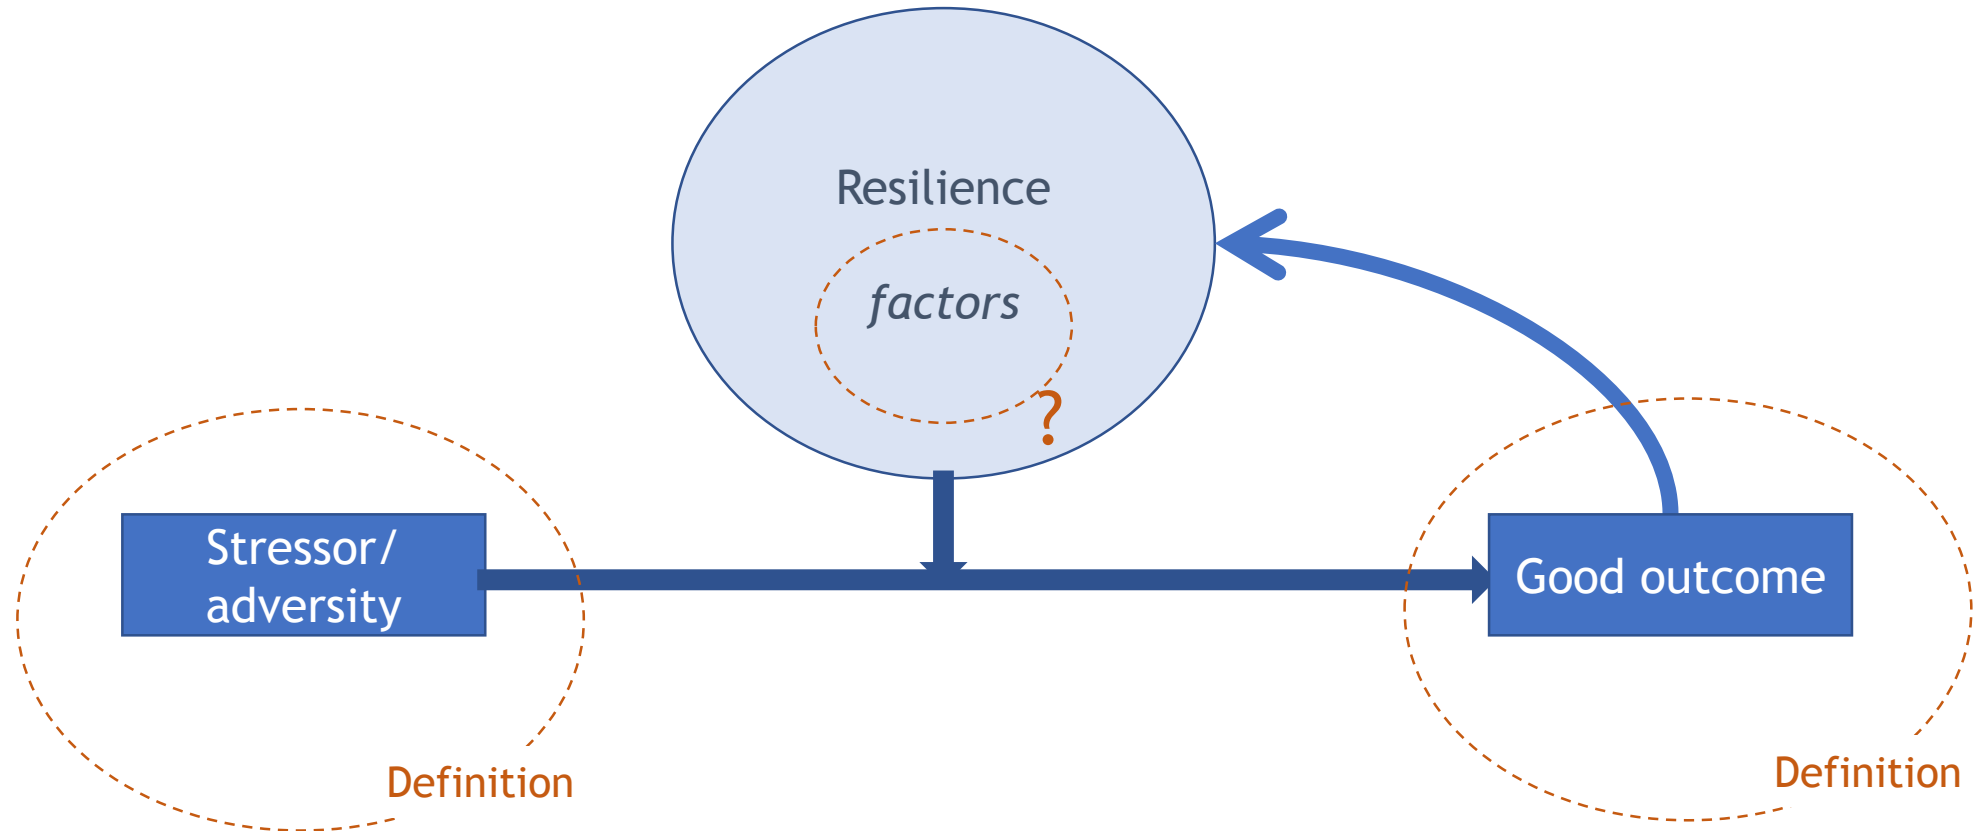

# Example: quantitative

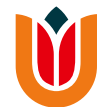

*Hildon et al. 2009*

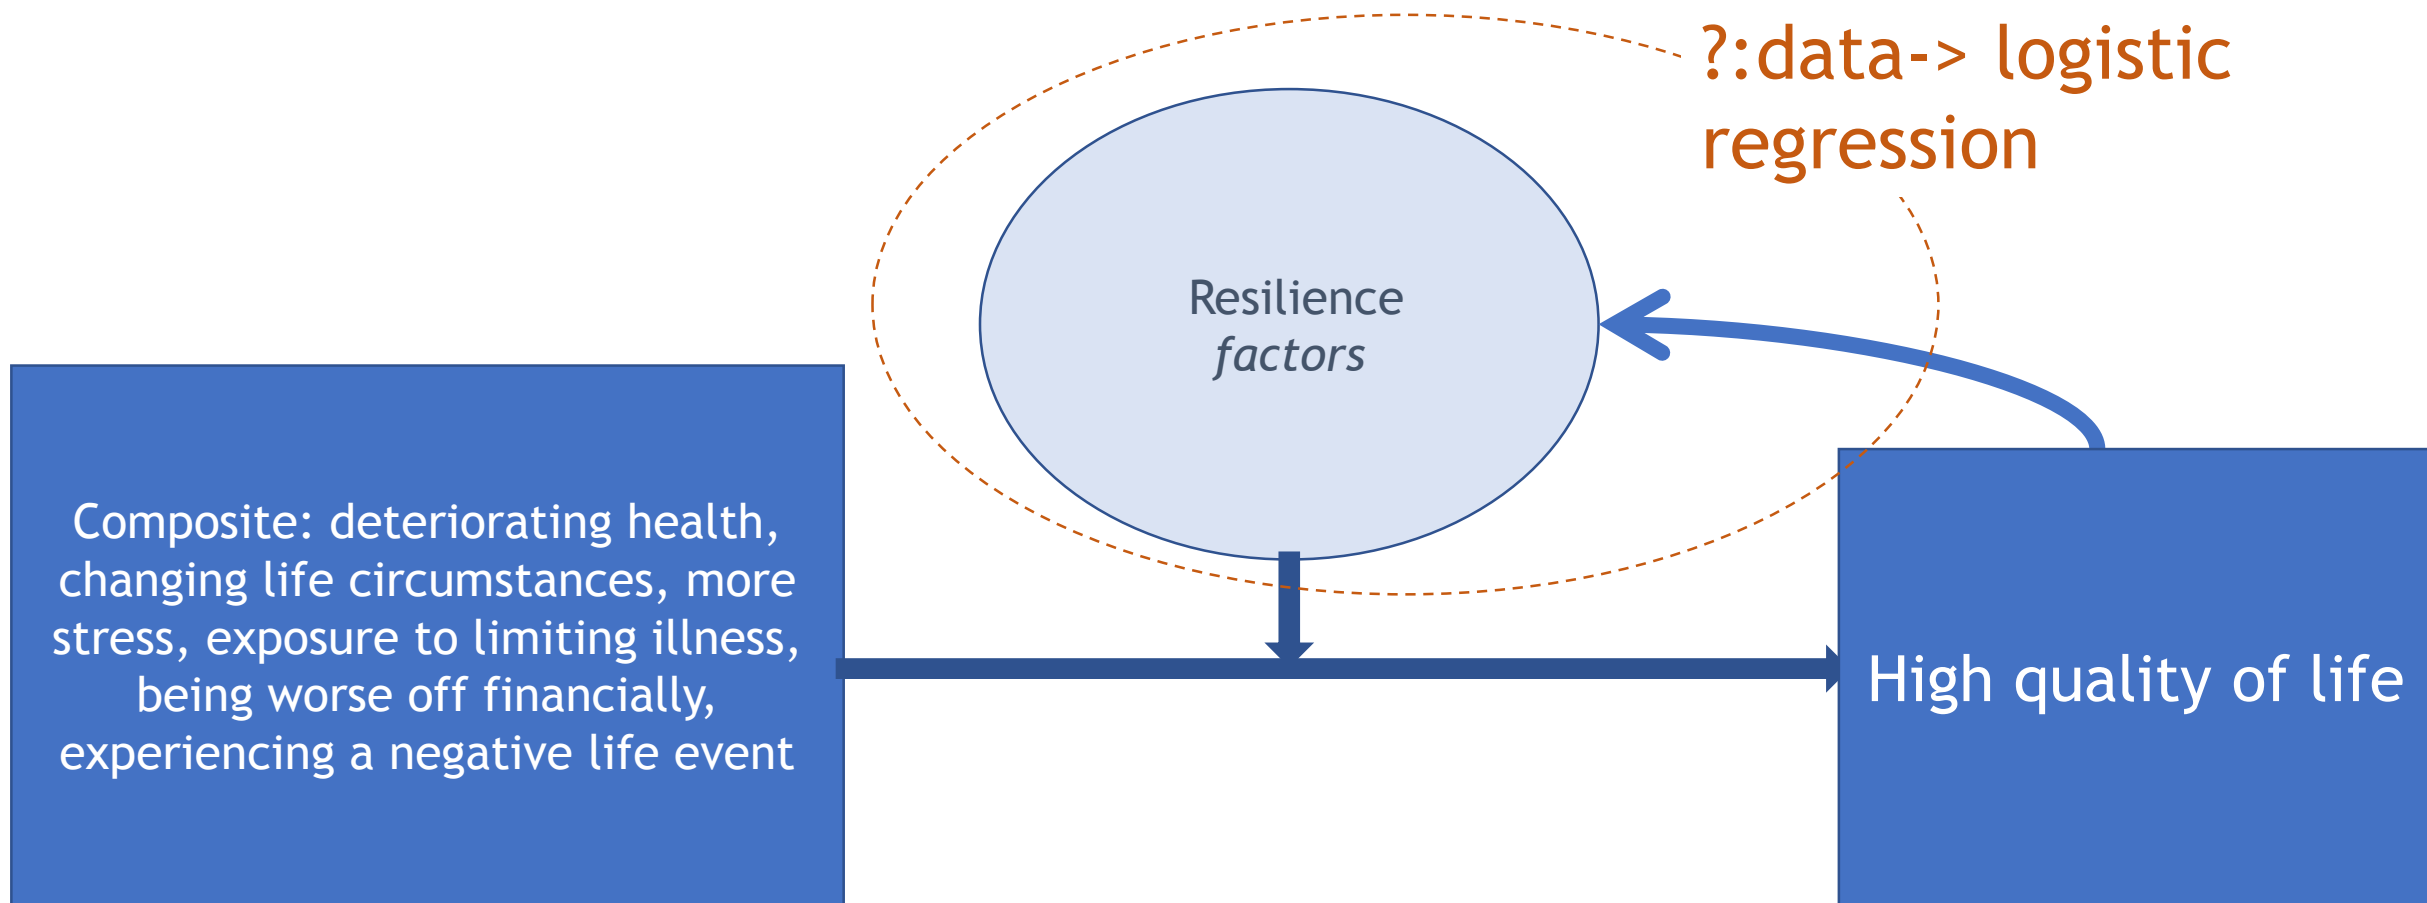

# Example: qualitative



*Kok et al. 2018*

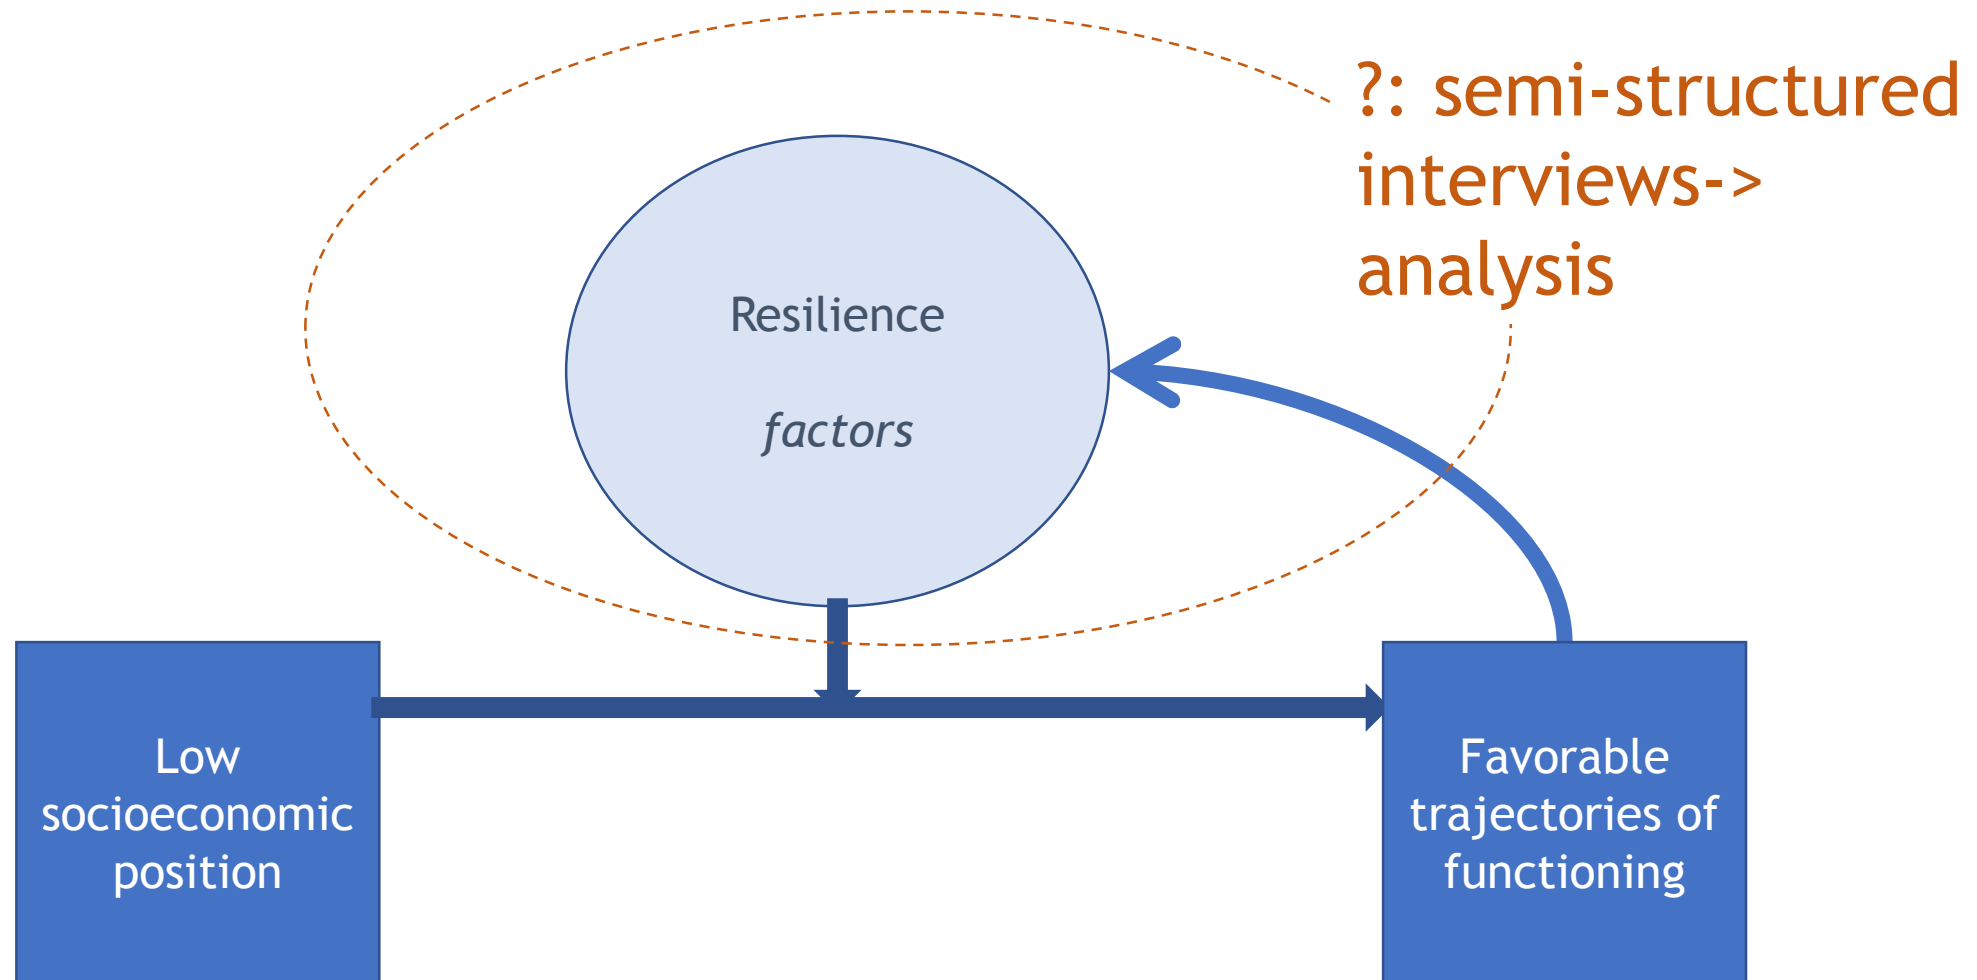



# Factors

- Coping strategies
- Positive emotions/optimism
- Having a life goal/ caring for others/generativity
- Spirituality
- (Self-rated) health
- Physical activity
- Social support

*Kessel 2013,  
Macleod 2016*



# Resilience

- Two approaches
  - Dynamical systems approach
    - Based on times series of functioning
      - Adversity not defined: naturally (constantly) occurring perturbations
      - Outcome: DIORs
  - A-priori
    - Based on definitions of:
      - Adversity
      - Good outcome
- Focus group: value approaches for research/ practice





# References

- Gijzel SMW, van de Leemput IA, Scheffer M, Roppolo M, Olde Rikkert MGM, Melis RJF. Dynamical Resilience Indicators in Time Series of Self-Rated Health Correspond to Frailty Levels in Older Adults. *J Gerontol A Biol Sci Med Sci* (2017) 72(7):991-6.
- Gijzel SMW, van de Leemput IA, Scheffer M, van Bon GEA, Weerdesteyn V, Eijsvogels TMH, et al. Dynamical indicators of resilience in postural balance time series are related to successful aging in high-functioning older adults. *J Gerontol A Biol Sci Med Sci* (2018). Epub 2018/07/28. doi: 10.1093/gerona/gly170.
- Hildon, ZMA; Montgomery, SM; et al. Examining Resilience of Quality of Life in the Face of Health-Related and Psychosocial Adversity at Older Ages: What is “Right” About the Way we Age? *The gerontologist*. 2009; 50(1): 36-47.
- Infurna, FJ; Luthar, SS. The Multidimensional Nature of Resilience to Spousal Loss. *J Pers Soc Psychol*. 2017 June; 112(6):926-947.
- Van Kessel, G. The ability of older people to overcome adversity: A review of the resilience concept. *Geriatric Nursing*. 2013; 34(2):122-127.
- Kok, AAL; van Nes, F; Deeg, D.J.H.; Widdershoven, G; Huisman, M. “Tough Times Have Become Good Times”: Resilience in Older Adults With a Low Socioeconomic Position. *Gerontologist*, 2018, 58(5): 843-852.
- MacLeod S, Musich S , Hawkins K , et al. The impact of resilience among older adults. *Geriatr Nurs* 2016;37:266-72.
- Whitson HE, Duan-Porter W, Schmader KE, Morey MC, Cohen HJ, Colon-Emeric CS. Physical resilience in older adults: Systematic review and development of an emerging construct. *J Gerontol A Biol Sci Med Sci* 2016;71A:489-495.
